# Supplementary material for: Structural Basis for Activity Regulation and Substrate Preference of Clostridial Collagenases G, H, and T
Source: PubMed Central journal article supplement (PMC3711286; doi:10.1074/jbc.m112.448548), 2013-05-23
Supplement: supp_M112.448548_jbc.M112.448548-3.pdf [file supp_M112.448548_jbc.M112.448548-3.pdf]

**Supplemental Table 1. Sequence features of clostridial collagenases**

|                                | Collagenase G |                    |     | Collagenase H |                    |     | Collagenase T |                    |     |
|--------------------------------|---------------|--------------------|-----|---------------|--------------------|-----|---------------|--------------------|-----|
| <b>Asp-switch</b>              | 487           | GVSTDN             | 492 | 419           | GYDTNN             | 424 | 429           | GYSVDN             | 434 |
| <b>Double-Gly motif</b>        |               |                    |     |               |                    |     |               |                    |     |
| <b>Edge strand</b>             | 493           | GG LYIE            | 498 | 425           | GG MYIE            | 430 | 435           | GG IYIE            | 440 |
| <b>Wall motif</b>              | 511           | QQSIF              | 515 | 443           | QESTY              | 447 | 453           | QESYI              | 457 |
| <b>Central helix</b>           | 517           | LEEL...ARYL        | 534 | 449           | LEEL...GRYA        | 466 | 459           | LEEL...GRYL        | 476 |
| <b>Ca<sup>2+</sup>-binding</b> | 498           | <b>E...ARYLVDG</b> | 537 | 430           | <b>E...GRYAVPG</b> | 469 | 440           | <b>E...GRYLIPG</b> | 479 |
| <b>Zinc-binding</b>            | 523           | <b>HEYTH...E</b>   | 555 | 455           | <b>HEYTH...E</b>   | 487 | 465           | <b>HEFTH...E</b>   | 499 |
| <b>Gluzincin helix</b>         | 550           | LTWF...FFAG        | 563 | 482           | LTWY...LFAG        | 495 | 494           | ITWF...FFAG        | 507 |
| <b>Selectivity loop</b>        | 598           | GYDDSDWM*          | 605 | 530           | KYGASFE            | 536 | 540           | KYSDGWD*           | 546 |

\* Residues corresponding, but not found to form a selectivity loop.
