# Supplementary material for: Structural Basis for Activity Regulation and Substrate Preference of Clostridial Collagenases G, H, and T
Source: PubMed Central journal article supplement (PMC3711286; doi:10.1074/jbc.m112.448548), 2013-05-23
Supplement: supp_M112.448548_jbc.M112.448548-4.pdf [file supp_M112.448548_jbc.M112.448548-4.pdf]

## Supplemental Table 2 Metal binding sites of clostridial collagenases

### A) Zinc binding site of clostridial collagenases

| ColH peptidase domain  |              |                        |      | ColT peptidase domain  |              |                                                                                                     |      |             | ColG collagenase unit |                        |                          |      |       |
|------------------------|--------------|------------------------|------|------------------------|--------------|-----------------------------------------------------------------------------------------------------|------|-------------|-----------------------|------------------------|--------------------------|------|-------|
|                        |              | - Inhibitor+ Inhibitor |      |                        |              | - Inhibitor <sup>A</sup> - Inhibitor <sup>B</sup> + Inhibitor <sup>A</sup> + Inhibitor <sup>B</sup> |      |             |                       |                        | - Inhibitor + Inhibitor* |      |       |
| <b>Resolution (Å)</b>  |              | 2.01                   | 1.77 | <b>Resolution (Å)</b>  | 1.69         | 1.69                                                                                                | 2.05 | 2.05        | <b>Resolution (Å)</b> | 2.19                   | 3.25                     |      |       |
| <b>Zn<sup>2+</sup></b> | <b>Occ</b>   | 1.0                    | 1.0  | <b>Zn<sup>2+</sup></b> | <b>Occ</b>   | 1.0                                                                                                 | 1.0  | 1.0         | 1.0                   | <b>Zn<sup>2+</sup></b> | <b>Occ</b>               | 1.0  | 1.0   |
|                        | <b>B-fac</b> | 26.1                   | 20.8 |                        | <b>B-fac</b> | 33.8                                                                                                | 20.5 | 34.0        | 38.1                  |                        | <b>B-fac</b>             | 52.7 | 55.58 |
| <b>His455</b>          | <b>Dist</b>  | 2.03                   | 2.06 | <b>His465</b>          | <b>Dist</b>  | 2.04                                                                                                | 2.03 | 2.03        | 2.04                  | <b>His523</b>          | <b>Dist</b>              | 2.09 | 2.08  |
|                        | <b>B-fac</b> | 25.7                   | 20.3 |                        | <b>B-fac</b> | 26.3                                                                                                | 18.1 | 32.4        | 34.0                  |                        | <b>B-fac</b>             | 53.8 | 63.03 |
| <b>His459</b>          | <b>Dist</b>  | 2.03                   | 2.03 | <b>His469</b>          | <b>Dist</b>  | 2.03                                                                                                | 2.03 | 2.03        | 2.03                  | <b>His527</b>          | <b>Dist</b>              | 2.11 | 2.09  |
|                        | <b>B-fac</b> | 26.8                   | 22.0 |                        | <b>B-fac</b> | 17.0                                                                                                | 16.7 | 29.5        | 33.7                  |                        | <b>B-fac</b>             | 43.1 | 60.4  |
| <b>Glu487</b>          | <b>Dist</b>  | 1.99                   | 2.00 | <b>Glu499</b>          | <b>Dist</b>  | 2.00                                                                                                | 1.99 | 1.99        | 1.99                  | <b>Glu555</b>          | <b>Dist</b>              | 2.00 | 2.09  |
|                        | <b>B-fac</b> | 24.2                   | 21.2 |                        | <b>B-fac</b> | 23.3                                                                                                | 21.4 | 28.2        | 34.2                  |                        | <b>B-fac</b>             | 57.1 | 85.0  |
| <b>Asp421</b>          | <b>Dist</b>  | 2.01                   | -    | <b>H<sub>2</sub>O</b>  | <b>Dist</b>  | 2.03                                                                                                | 2.02 |             |                       | <b>H<sub>2</sub>O</b>  | <b>Dist</b>              | 2.08 | 2.07  |
|                        | <b>B-fac</b> | 34.5                   | -    |                        | <b>B-fac</b> | 37.3                                                                                                | 24.6 |             |                       |                        | <b>B-fac</b>             | 40.7 | 58.3  |
| <b>IPI</b>             | <b>Dist</b>  | -                      | 1.99 | <b>IPI</b>             | <b>Dist</b>  | -                                                                                                   | -    | 2.03   2.24 | 2.03                  | <b>IPI</b>             | <b>Dist</b>              | -    | 2.08  |
|                        | <b>B-fac</b> | -                      | 22.9 |                        | <b>B-fac</b> | -                                                                                                   | -    | 42.5   34.5 | 44.7                  |                        | <b>B-fac</b>             | -    | 72.1  |

<sup>A,B</sup> Monomer A and B of the asymmetric unit.

\* Based on data published previously (7).

## Supplemental Table 2 Metal binding sites of clostridial collagenases

### B) Calcium binding sites of clostridial collagenases

| ColH peptidase domain   |              |                        |      | ColT peptidase domain   |              |                                                                                                     |      |      | ColG PKD-like domain   |             |             |
|-------------------------|--------------|------------------------|------|-------------------------|--------------|-----------------------------------------------------------------------------------------------------|------|------|------------------------|-------------|-------------|
|                         |              | - Inhibitor+ Inhibitor |      |                         |              | - Inhibitor <sup>A</sup> - Inhibitor <sup>B</sup> + Inhibitor <sup>A</sup> + Inhibitor <sup>B</sup> |      |      |                        |             |             |
| <b>Resolution (Å)</b>   |              | 2.01                   | 1.77 | <b>Resolution (Å)</b>   | 1.69         | 1.69                                                                                                | 2.05 | 2.05 | <b>Resolution (Å)</b>  | 0.99        |             |
| <b>Ca<sup>2+</sup></b>  | <b>Occ</b>   | 1.0                    | 1.0  | <b>Ca<sup>2+</sup></b>  | <b>Occ</b>   | 1.0                                                                                                 | 1.0  | 1.0  | <b>Ca<sup>2+</sup></b> | <b>Occ</b>  | 1.0         |
|                         | <b>B-fac</b> | 25.1                   | 19.1 |                         | <b>B-fac</b> | 13.5                                                                                                | 14.4 | 25.2 | <b>B-fac</b>           | 5.8         |             |
| <b>Glu430</b>           | <b>Dist</b>  | 2.21   2.43            | 2.34 | <b>Glu440</b>           | <b>Dist</b>  | 2.32                                                                                                | 2.31 | 2.31 | <b>Asn795</b>          | <b>Dist</b> | 2.43        |
|                         | <b>B-fac</b> | 27.2   26.4            | 20.8 |                         | <b>B-fac</b> | 18.9                                                                                                | 15.7 | 24.7 | <b>B-fac</b>           | 7.5         |             |
| <b>Gly463</b>           | <b>Dist</b>  | 2.36                   | 2.32 | <b>Gly473</b>           | <b>Dist</b>  | 2.35                                                                                                | 2.35 | 2.32 | <b>Lys796</b>          | <b>Dist</b> | 2.36        |
|                         | <b>B-fac</b> | 23.9                   | 19.8 |                         | <b>B-fac</b> | 13.7                                                                                                | 15.2 | 22.5 | <b>B-fac</b>           | 5.8         |             |
| <b>Val467</b>           | <b>Dist</b>  | 2.37                   | 2.31 | <b>Ile477</b>           | <b>Dist</b>  | 2.35                                                                                                | 2.34 | 2.32 | <b>Asp823</b>          | <b>Dist</b> | 2.42   2.43 |
|                         | <b>B-fac</b> | 25.1                   | 20.9 |                         | <b>B-fac</b> | 14.7                                                                                                | 14.3 | 22.9 | <b>B-fac</b>           | 8.2   7.5   |             |
| <b>Gly469</b>           | <b>Dist</b>  | 2.35                   | 2.31 | <b>Gly479</b>           | <b>Dist</b>  | 2.34                                                                                                | 2.35 | 2.32 | <b>Asp825</b>          | <b>Dist</b> | 2.29        |
|                         | <b>B-fac</b> | 24.9                   | 22.6 |                         | <b>B-fac</b> | 17.7                                                                                                | 15.9 | 24.8 | <b>B-fac</b>           | 7.3         |             |
| <b>H<sub>2</sub>O_1</b> | <b>Dist</b>  | 2.18                   | 2.36 | <b>H<sub>2</sub>O_1</b> | <b>Dist</b>  | 2.36                                                                                                | 2.39 | 2.35 | <b>Asp864</b>          | <b>Dist</b> | 2.35        |
|                         | <b>B-fac</b> | 21.7                   | 20.5 |                         | <b>B-fac</b> | 16.5                                                                                                | 13.4 | 27.1 | <b>B-fac</b>           | 5.4         |             |
| <b>H<sub>2</sub>O_2</b> | <b>Dist</b>  | 2.67                   | 2.41 | <b>H<sub>2</sub>O_2</b> | <b>Dist</b>  | 2.40                                                                                                | 2.40 | 2.35 | <b>H<sub>2</sub>O</b>  | <b>Dist</b> | 2.43        |
|                         | <b>B-fac</b> | 24.4                   | 18.2 |                         | <b>B-fac</b> | 15.0                                                                                                | 13.8 | 22.7 | <b>B-fac</b>           | 8.5         |             |

<sup>A,B</sup> Monomer A and B of the asymmetric unit.
